# Supplementary material
Source: PubMed Central journal article supplement (PMC11094612)
Supplement: NIHMS1989629-supplement-Interview_Questions.pdf [file NIHMS1989629-supplement-Interview_Questions.pdf]

## **List of Post-study Interview Questions**

1. What was it like having Jibo in your home/room?
2. Describe to me your interactions with Jibo.
3. What were three things you liked about your interactions with Jibo?
4. What were three things you disliked about your interactions with Jibo?
5. What other things did you do with Jibo other than the wellness skill? What did you like/dislike about them?
6. (coach/companion only) What did you think of the wellness activity content?
7. (coach/companion only) What did you think about the length of each session and the amount of content presented? Did you find them interesting or boring? Why?
8. What did you think of the robot's personality and talking style? Too formal or casual? Why?
9. (coach/companion only) Would you continue practicing the wellness activities you learned from Jibo even after the robot is no longer with you?
10. Let's imagine a world where everyone has a personal robot like we have smartphones now. If there's no restriction in technology or resources, what would you like the robot do for you? What would be your "dream" robot?

Descriptive Statistics for Participants Across Experimental Conditions

| Variable                  | All (N=70)      | Control (n=18)     | Coach (n=24)    | Companion (n=28) | p-value |
|---------------------------|-----------------|--------------------|-----------------|------------------|---------|
| Gender, No. (%)           |                 |                    |                 |                  |         |
| Male                      | 20 (28.5)       | 5 (27.7)           | 6 (25)          | 9 (32.1)         | 0.958   |
| Female                    | 46 (65.7)       | 12 (66.6)          | 17 (70.8)       | 17 (60.7)        |         |
| Other                     | 4 (5.71)        | 1 (5.55)           | 1 (4.16)        | 2 (7.14)         |         |
| Race/ethnicity, No. (%)   |                 |                    |                 |                  |         |
| White                     | 44 (62.8)       | 12 (66.6)          | 13 (54.1)       | 19 (67.8)        | 0.525   |
| Hispanic or Latino        | 2 (2.85)        | 0 (0)              | 1 (4.16)        | 1 (3.57)         |         |
| Black or African American | 2 (2.85)        | 0 (0)              | 2 (8.33)        | 0 (0)            |         |
| Asian / Pacific Islander  | 20 (28.5)       | 6 (33.3)           | 6 (24)          | 8 (28.5)         |         |
| Native American           | 1 (1.42)        | 0 (0)              | 1 (4.16)        | 0 (0)            |         |
| Multi-racial              | 1 (1.42)        | 0 (0)              | 1 (4.16)        | 0 (0)            |         |
| Age, M (SD)               | 46.157 (23.069) | 42.778 (24.291)    | 50.167 (22.964) | 44.893 (22.71)   | 0.557   |
| Personality, M (SD)       |                 |                    |                 |                  |         |
| Openness                  | 3.614 (0.492)   | 3.528 (0.445)      | 3.719 (0.491)   | 3.580 (0.523)    | 0.419   |
| Conscientiousness         | 3.668 (0.755)   | 3.514 (0.672)      | 3.646 (0.729)   | 3.786 (0.83)     | 0.491   |
| Extraversion              | 3.089 (0.821)   | 3.125 (0.859)      | 2.938 (0.781)   | 3.196 (0.84)     | 0.521   |
| Agreeableness             | 4.15 (0.669)    | 4.0 (0.767)        | 4.042 (0.662)   | 4.339 (0.582)    | 0.152   |
| Neuroticism               | 2.782 (0.95)    | 2.833 (1.095)      | 2.708 (0.908)   | 2.812 (0.917)    | 0.896   |
| PHQ-9, M (SD)             | 4.818 (3.557)   | 6.833 (4.16733328) | 4.083 (3.118)   | 4.600 (3.582)    | 0.296   |
